# Supplementary material for: Mindfulness and its efficacy for psychological and biological responses in women with breast cancer
Source: PubMed Central journal article supplement (PMC5430085; doi:10.1002/cam4.1052), 2017-04-18
Supplement: CAM4-6-1108-s001.pdf [file CAM4-6-1108-s001.pdf]

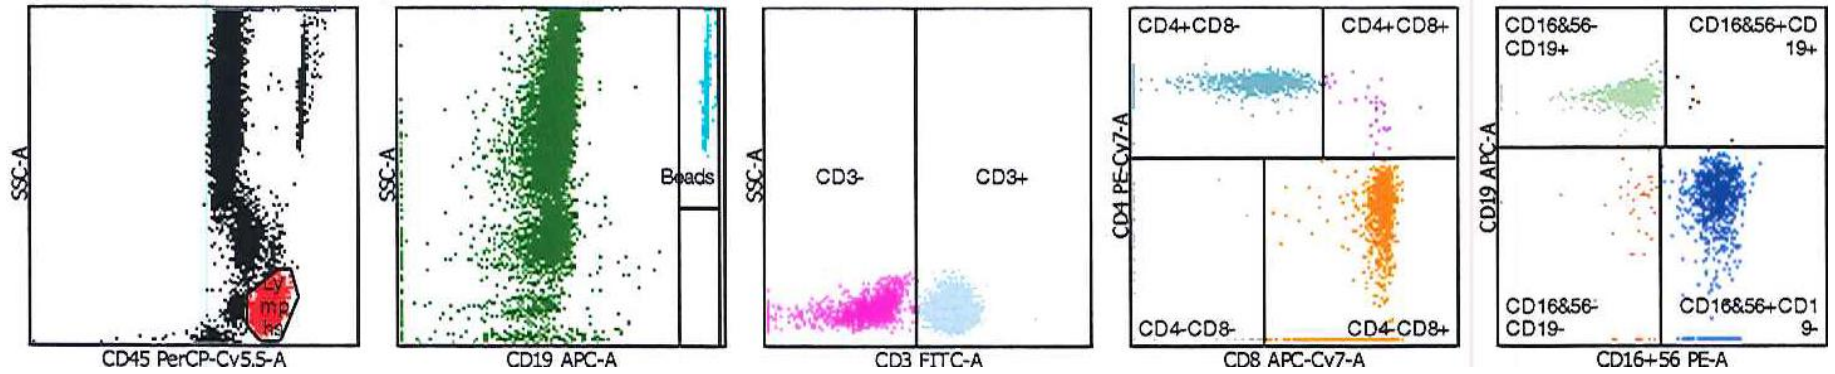

Fig X. Typical result with dot plots showing CD3+, CD3+4+, CD3+8+, 19- and CD3-16+56+ cells. Absolute numbers of cells were calculated using TruCount reference beads. Lymphocytes and TruCount beads were defined in a CD45 versus side scatter area (SSC-A) and a CD19 versus SSC-A plot respectively. CD3+ and CD3- cells were then defined in a CD3 versus SSC-A plot. Then CD3+4+ and CD3+8+ were defined in a plot of CD8 versus CD4. Finally CD19 and CD3-16+56+ cells were defined in a plot of CD16+56+ versus CD19.

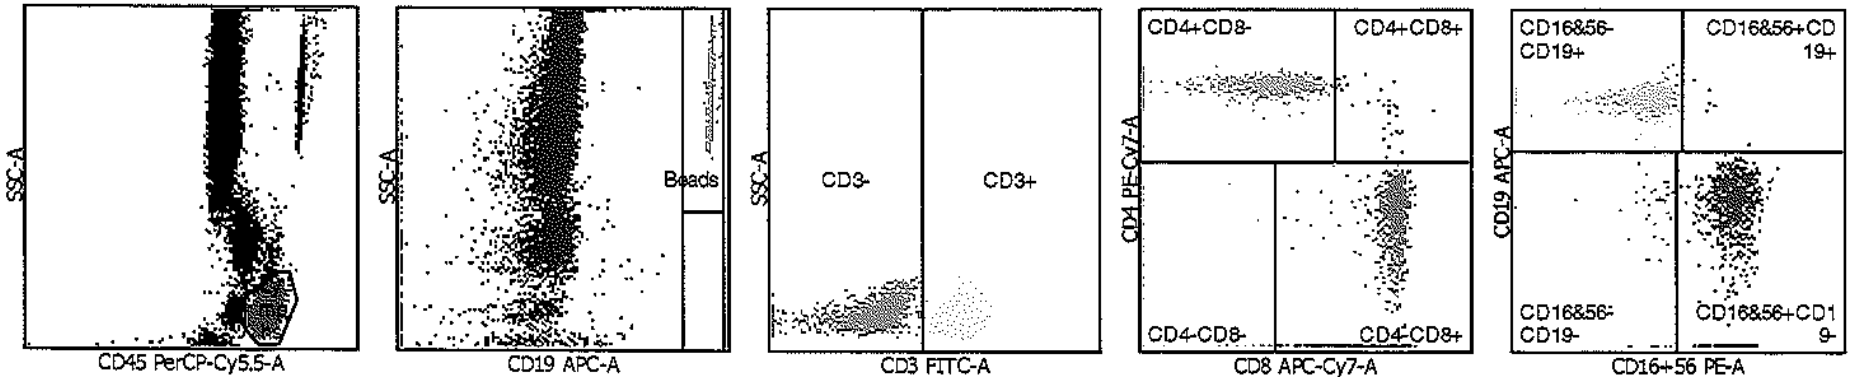

Fig X. Typical result with dot plots showing CD3+, CD3+4+, CD3+8+, 19- and CD3-16+56+ cells. Absolute numbers of cells were calculated using Trucount reference beads. Lymphocytes and Trucount beads were defined in a CD45 versus side scatter area (SSC-A) and a CD19 versus SSC-A plot respectively. CD3+ and CD3- cells were then defined in a CD3 versus SSC-A plot. Then CD3+4+ and CD3+8+ were defined in a plot of CD8 versus CD4. Finally CD19 and CD3-16+56+ cells were defined in a plot of CD16+56 versus CD19.

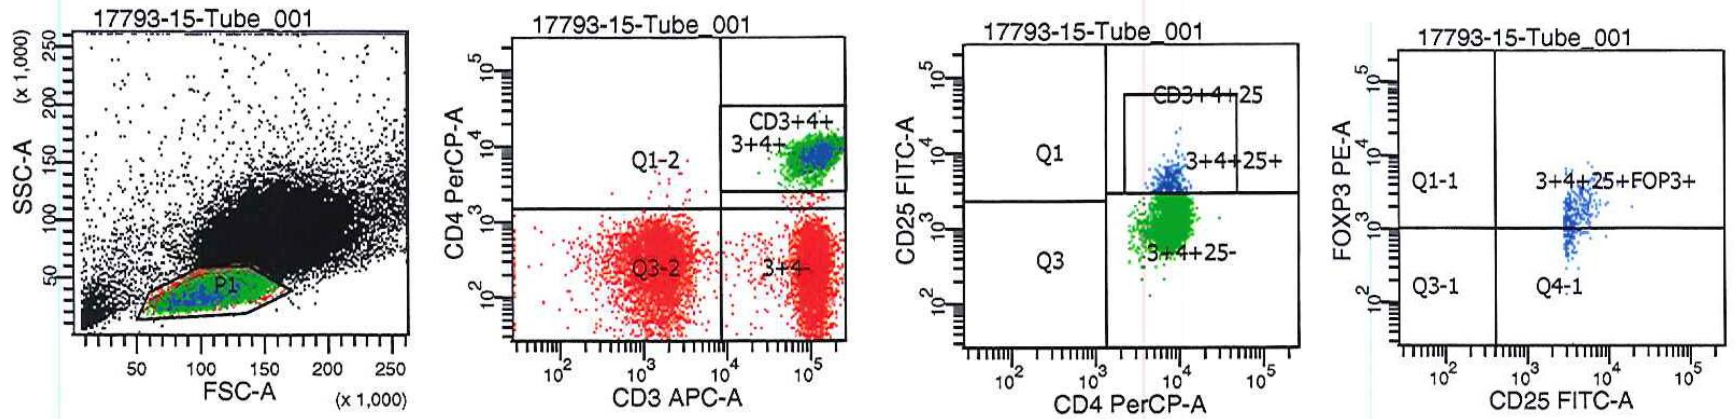

Fig Y. Typical result with dot plots showing regulatory T cells. Lymphocytes were defined in a forward scatter area (FSC-A) versus side scatter area (SSC-A) plot. CD3+4+ cells were then defined in a CD3 versus CD4 plot. Then CD3+4+25+ were defined in a plot of CD4 versus CD25. Finally CD3+4+25+FOXP3++ (regulatory T cells) cells were defined in a plot of CD25 versus FOXP3.

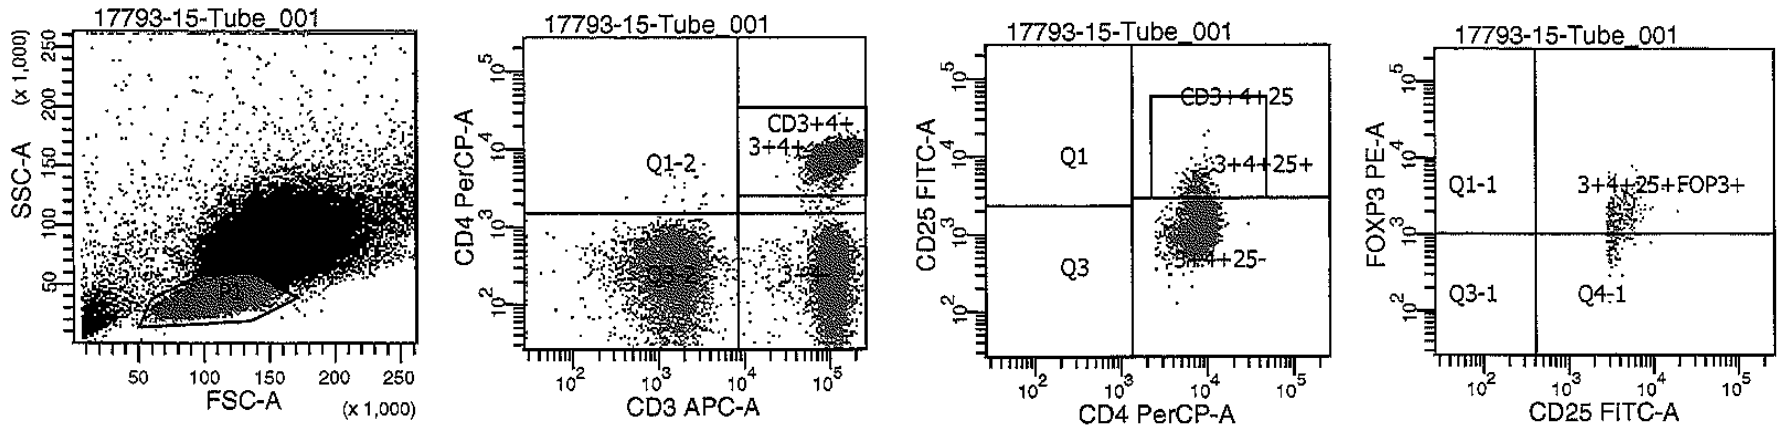

Fig Y. Typical result with dot plots showing regulatory T cells. Lymphocytes were defined in a forward scatter area (FSC-A) versus side scatter area (SSC-A) plot. CD3+4+ cells were then defined in a CD3 versus CD4 plot. Then CD3+4+25+ were defined in a plot of CD4 versus CD25. Finally CD3+4+25+FOXP3++ (regulatory T cells) cells were defined in a plot of CD25 versus FOXP3.
